# Supplementary material
Source: PubMed Central journal article supplement (PMC2652311)

**Supplemental Data**

**PEROXISOME DEFICIENCY CAUSES A COMPLEX PHENOTYPE DUE TO  
HEPATIC SREBP/INSIG DYSREGULATION ASSOCIATED WITH  
ENDOPLASMIC RETICULUM STRESS**

**Werner J. Kovacs, Khanichi N. Tape, Janis E. Shackelford, Thomas M. Wikander, Michael J. Richards, Steven J. Fliesler, Skaidrite K. Krisans and Phyllis L. Faust**

**TABLE S1.** Activities of cholesterol biosynthetic enzymes in kidneys of P9 BA-fed control and *PEX2* knockout mice

| Enzyme            | Enzyme activity (pmol/min/mg of protein) in: |                                 | Ratio of activities |
|-------------------|----------------------------------------------|---------------------------------|---------------------|
|                   | Control mice                                 | <i>PEX2</i> <sup>-/-</sup> mice |                     |
| HMG-CoA reductase | 57.1 ± 4.6 (4)                               | 32.9 ± 3.2 (3) **               | 0.6                 |
| IPP isomerase     | 218.0 ± 5.0 (4)                              | 343.2 ± 62.7 (3) *              | 1.6                 |
| FPP synthase      | 297.4 ± 30.0 (4)                             | 466.9 ± 84.5 (3) *              | 1.6                 |
| Squalene synthase | 2.1 ± 0.4 (4)                                | 3.1 ± 0.9 (3)                   | 1.5                 |

Each value represents the mean ± standard deviation. Values in parentheses denote the number of samples. The measured activities in BA-fed mice did not significantly differ from that in untreated mice (Kovacs et al., 2004). \*,  $P < 0.01$ ; \*\*,  $P < 0.001$  (Student's *t* test). Ratio of activities = *PEX2*<sup>-/-</sup>/control.

**TABLE S2.** Expression of SREBP regulated genes in the liver of P9 *PEX2*<sup>-/-</sup> mice

| Gene                                                        | Gene Symbol | Relative expression | GenBank   |
|-------------------------------------------------------------|-------------|---------------------|-----------|
| <b>Cholesterol Synthesis, Uptake, &amp; Metabolism</b>      |             |                     |           |
| Acetoacetyl-CoA synthetase                                  | Aacs        | 2.4                 | NM_030210 |
| Acetyl-CoA synthetase 2                                     | Acas2       | 7.2                 | NM_019811 |
| ATP citrate lyase                                           | Acly        | 10.1                | NM_134037 |
| HMG-CoA synthase *                                          | Hmgcs1      | 3.5                 | NM_145942 |
| HMG-CoA reductase *                                         | Hmgcr       | 15.7                | NM_008255 |
| Mevalonate kinase                                           | Mvk         | 21.6                | NM_023556 |
| Mevalonate pyrophosphate decarboxylase                      | Mvd         | 62.7                | NM_138656 |
| Isopentenyl-diphosphate $\Delta$ isomerase *                | Idi1        | 12.4                | NM_145360 |
| Farnesyl diphosphate synthase *                             | Fpps        | 11.9                | NM_134469 |
| Squalene epoxidase *                                        | Sqle        | 36.4                | NM_009270 |
| Lanosterol synthase *                                       | Lss         | 44.2                | NM_146006 |
| Lanosterol 14 $\alpha$ -demethylase                         | Cyp51       | 15.8                | NM_020010 |
| Sterol-C4-methyl oxidase-like                               | Sc4mol      | 27.8                | NM_025436 |
| NAD(P) dependent steroid dehydrogenase-like                 | Nsdhl       | 70.0                | NM_010941 |
| 17 $\beta$ -Hydroxysteroid dehydrogenase-7                  | Hsd17b7     | 3.5                 | NM_010476 |
| 3 $\beta$ -Hydroxysteroid- $\Delta$ 8, $\Delta$ 7-isomerase | Ebp         | 4.1                 | NM_007898 |
| Sterol-C5-desaturase                                        | Sc5d        | 2.0                 | NM_172769 |
| 7-Dehydrocholesterol reductase *                            | Dhcr7       | 1.7                 | NM_007856 |
| 24-Dehydrocholesterol reductase                             | Dhcr24      | 2.3                 | NM_053272 |
| Insig-1 *                                                   | Insig1      | 12                  | NM_153526 |
| Proprotein convertase subtilisin/kexin type 9               | Pcsk9       | 6.9                 | NM_153565 |
| LDL receptor *                                              | Ldlr        | ‡                   | NM_010700 |
| <b>Fatty Acid, TG, &amp; PL Synthesis</b>                   |             |                     |           |
| Fatty acid synthase *                                       | Fasn        | 4.3                 | NM_007988 |
| Malic enzyme                                                | Mod1        | 6.9                 | NM_008615 |
| Acetyl-CoA carboxylase beta                                 | Acc2        | 16.0                | BC022940  |
| Long-chain fatty acyl elongase                              | Elov16      | 3.4                 | NM_130450 |
| Stearoyl-CoA desaturase 2                                   | Scd2        | 24.5                | NM_009128 |
| Glycerol-3-phosphate acyltransferase                        | Gpam        | 4.3                 | NM_008149 |
| Fatty acid desaturase 2                                     | Fads2       | 2.6                 | NM_019699 |
| L-specific multifunctional b-oxidation protein *†           | Ehhadh      | 122.8               | NM_023737 |
| <b>Miscellaneous</b>                                        |             |                     |           |
| Mac30                                                       |             | 3                   | NM_133706 |
| Aldolase C                                                  | Aldoc       | ‡                   | NM_009657 |
| Retinol dehydrogenase 11                                    | Rdh11       | ‡                   | NM_021557 |
| Trefoil factor-3, intestinal                                | TFF3        | 2.9                 | NM_011575 |
| Carbonyl reductase-1                                        | Cbr1        | 15.2                | NM_007620 |
| Aldehyde dehydrogenase family-1, subfamily A7               | ALDH1A7     | 4.7                 | NM_011921 |
| Diazepam binding inhibitor *                                | Dbi         | 2.0                 | NM_007830 |
| Cysteine sulfinic acid decarboxylase                        | Csad        | 1.3                 | NM_144942 |

Total RNA was isolated from five P9 wild-type and *PEX2*<sup>-/-</sup> livers using the RNeasy Mini kit (Qiagen). Equal aliquots of total RNA from each of five mouse livers in each group were pooled and prepared for CodeLink oligonucleotide hybridization. Hybridization, washing, scanning, and analysis of the CodeLink Mouse 20K Bioarray (Amersham Biosciences) were carried out at the Biomedical Genomics Microarray Facility at the University of California San Diego. The relative mRNA expression of each gene in livers from *PEX2*<sup>-/-</sup> mice compared to the appropriate wild-type controls is shown.

\* Gene expression changes that have been verified by one or more methods, i.e. northern gel analysis, quantitative RT-PCR.

‡ Genes highly expressed in *PEX2*<sup>-/-</sup> mice but undetectable in wild-type mice.

† L-specific multifunctional  $\beta$ -oxidation protein is a peroxisomal enzyme involved in the oxidation of very long-chain fatty acids and the increased expression in *PEX2*<sup>-/-</sup> mice probably occurred through the activation of PPAR $\alpha$  as a response to increased fatty acid levels. Whether it is a direct target of SREBP-1 is unknown.

**Figure S1.** Relative amounts of various mRNAs in livers from P9 and P36 BA-fed control and *PEX2*<sup>-/-</sup> mice. RNA was analyzed by qRT-PCR as described in Fig. 4. Values represent the amount of mRNA relative to that in BA-fed control mice at the respective time point, which was arbitrarily defined as 1. Values are mean ± standard deviation from RNA samples of at least five individual mice, except for P36 untreated *PEX2* knockout, where n = 1. \*, *P* < 0.05; \*\*, *P* < 0.01; \*\*\*, *P* < 0.001 vs. BA-fed control mice (Student's *t* test).

**Figure S2.** Induction of UPR target genes in livers from P9 untreated and BA-fed control and *PEX2*<sup>-/-</sup> mice. Total RNAs were isolated and subjected to Northern Blot analysis. The same blot was hybridized sequentially with Grp78, Herpud1, CHOP, GADD45, p8, and 28S rRNA probes. The amount of radioactivity in each band was quantified by PhosphorImager analysis and normalized to that in control mice, which was arbitrarily defined as 1.

Supplemental Figure 1

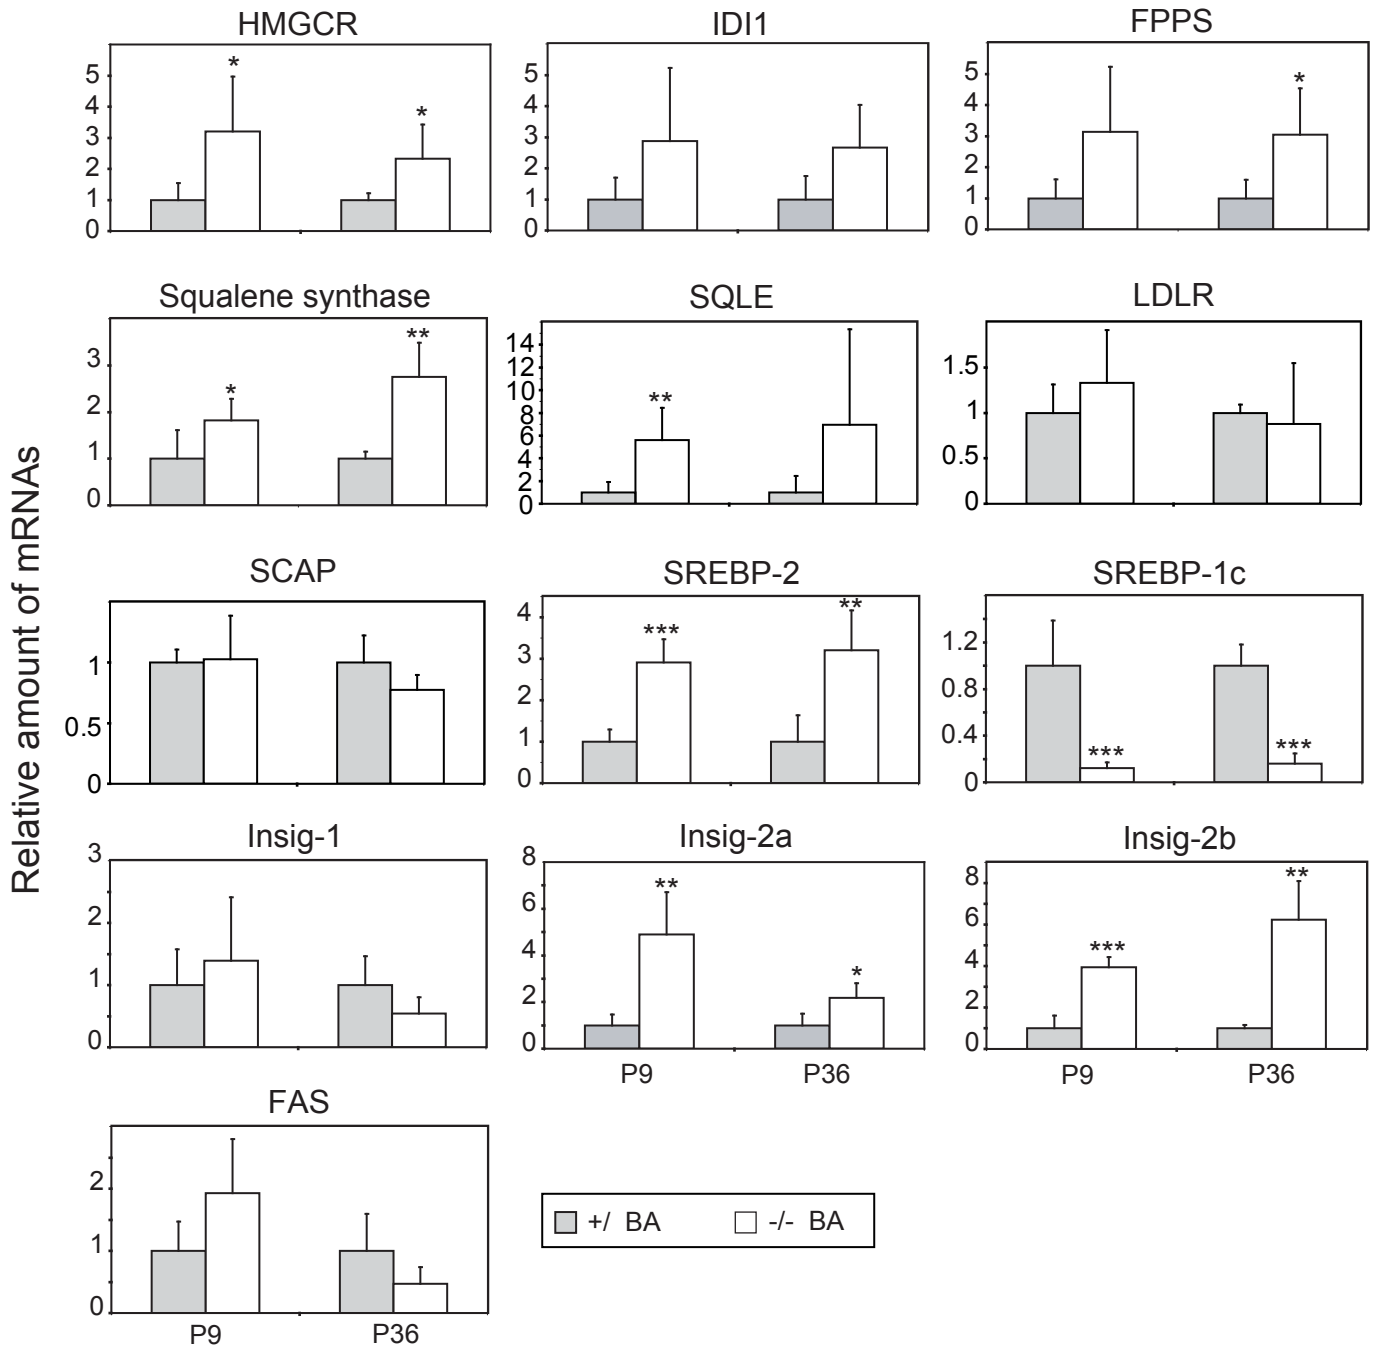

Supplemental Figure 2

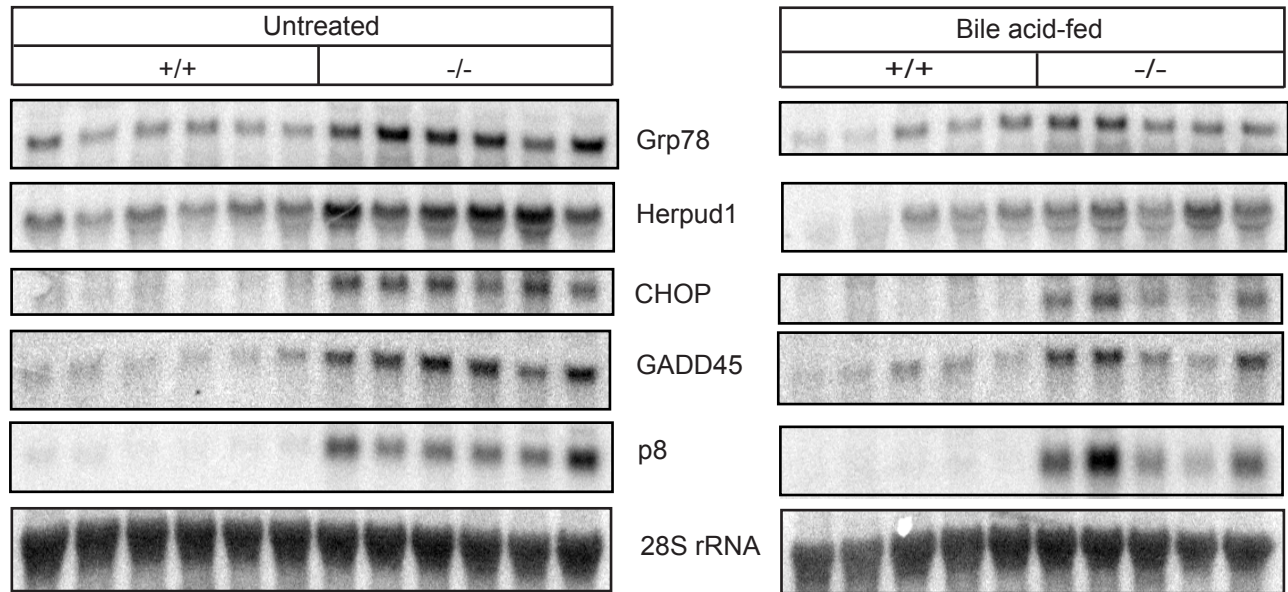

Supplement: M809064200_1.pdf [file M809064200_1.pdf]
